# Supplementary material for: Impact of productive and dry chronic cough on mortality in the Canadian Longitudinal Study on Aging (CLSA)
Source: PubMed Central journal article supplement — J Thorac Dis. 2022 Dec;14(12):5087–96. doi: 10.21037/jtd-22-1306 (PMC9840029; doi:10.21037/jtd-22-1306), 2022-12
Supplement: jtd-14-12-5087-dss.pdf [file jtd-14-12-5087-dss.pdf]

## Data Sharing Statement

|                     |                                                                                                                                                    |                                                                                                                                                                                                          |
|---------------------|----------------------------------------------------------------------------------------------------------------------------------------------------|----------------------------------------------------------------------------------------------------------------------------------------------------------------------------------------------------------|
| <b>Article Info</b> | <a href="https://dx.doi.org/10.21037/jtd-22-1306">https://dx.doi.org/10.21037/jtd-22-1306</a>                                                      |                                                                                                                                                                                                          |
| <b>Item</b>         | <b>Question</b>                                                                                                                                    | <b>Authors' Response<br/>(place "-" if not applicable)</b>                                                                                                                                               |
| 1                   | Would you like to share data collected for your study to others?                                                                                   | No                                                                                                                                                                                                       |
| 2                   | If not, would you like to share the reason for your decision?                                                                                      | Data are available from the Canadian Longitudinal Study on Aging ( <a href="http://www.clsa-elcv.ca">www.clsa-elcv.ca</a> ) for researchers who meet the criteria for access to de-identified CLSA data. |
| 3                   | What data in particular will be shared?                                                                                                            |                                                                                                                                                                                                          |
| 4                   | Any other documents will be share? Such as study protocol, statistical analysis plan, informed consent form, clinical study report, analytic code. |                                                                                                                                                                                                          |
| 5                   | When will data availability begin?                                                                                                                 |                                                                                                                                                                                                          |
| 6                   | When will data availability end?                                                                                                                   |                                                                                                                                                                                                          |
| 7                   | To whom will you share the data?                                                                                                                   |                                                                                                                                                                                                          |
| 8                   | For what type of analysis or purpose?                                                                                                              |                                                                                                                                                                                                          |
| 9                   | How or where can the data/documents be obtained?                                                                                                   |                                                                                                                                                                                                          |
| 10                  | Any other restrictions?                                                                                                                            |                                                                                                                                                                                                          |
